# Supplementary material
Source: publisher figshare collection journal article supplement (https://karger.figshare.com/articles/dataset/_/5241175)
Supplement: Supplementary file 1 [file 1]

## Erratum

---

In the article by Aoyagi et al: Habitual physical activity and physical fitness in older Japanese adults: the Nakonojo study. *Gerontology* 2009;55:523–531, an error occurred in table 1.

Please note: the value for 'Peak handgrip force' under the column 'Men' should now read  $334 \pm 61$ .
